# Supplementary material for: Comparative Bacterial Proteomics: Analysis of the Core Genome Concept
Source: PubMed Central journal article supplement (PMC2213561; doi:10.1371/journal.pone.0001542), 2008-02-06
Supplement: pone.0001542.s001.pdf [file pone.0001542.s001.pdf]

*Arthrobacter* sp.  
*C. crescentus*  
*D. desulfuricans*  
*D. radiodurans*  
*D. vulgaris*  
*G. metallireducens*  
*G. sulfurreducens*  
*P. fluorescens*  
*P. ubique*  
*R. sphaeroides*  
*S. oneidensis*  
*S. typhimurium*  
*S. typhi*  
*Synechocystis* sp.  
*Y. enterocolitica*  
*Y. pestis* KIM  
*Y. pseudotuberculosis*

```
CH- HHHHHHHHHHHHHHHHHH CCCC EEEEE CCCC EEEEEEEEEEE CCH HHHHHHHHHHHHHHHHHH -CCCCCEEC CCCC EEEEE CCE EEEEEEH HHHHHHCHHHHHH C C-  
--- HHHHHHHHHHHHHHHHHH CCCC EEEEE CCCC EEEEEEEEEEE CCH HHHHHHHHHHHHHHHHHH -CCCCCCCCCCCCC EEEEE CCE EEEEEEH HHHHHHCHHHHHH ---  
HHH HHHHHHHHHHHHHHHHHH CCCC EEEEE CCCC EEEEEEEEEEE CCH HHHHHHHHHHHHHHHHHH -CCCCCCCCCCCCC EEEEE CCE EEEEEEH HHHHHHCHHHHHH C C C C  
CCC HHHHHHHHHHHHHHHHHH CCCC EEEEE CCCC EEEEEEEEEEE CCH HHHHHHHHHHHHHHHHHH -CCCCCCCCCCCCC EEEEE CCE EEEEEEH HHHHHHCHHHHHH ---  
CCC HHHHHHHHHHHHHHHHHH CCCC EEEEE CCCC EEEEEEEEEEE CCH HHHHHHHHHHHHHHHHHH -CCCCCCCCCCCCC EEEEE CCE EEEEEEH HHHHHHCHHHHHH C C C C  
HHH HHHHHHHHHHHHHHHHHH CCCC EEEEE CCCC EEEEEEEEEEE CCH HHHHHHHHHHHHHHHHHH -CCCCC- ECCCCC EEEEE CCE EEEEEEH HHHHHHCHHHHHH C C-  
CCC HHHHHHHHHHHHHHHHHH CCCC EEEEE CCCC EEEEEEEEEEE CCH HHHHHHHHHHHHHHHHHH -CCCCCCCCCCCCC EEEEE CCE EEEEEEH HHHHHHCHHHHHH C C C  
CCH HHHHHHHHHHHHHHHHHH CCCC EEEEE CCCC EEEEEEEEEEE CCH HHHHHHHHHHHHHHHHHH -CCCCCECC CCCC EEEEE CCE EEEEEEH HHHHHHCHHHHHH C C-  
HHH HHHHHHHHHHHHHHHHHH CCCC EEEEE CCCC EEEEEEEEEEE CCH HHHHHHHHHHHHHHHHHH -CCCCCCCCCCCCC EEEEE CCE EEEEEEH HHHHHHCHHHHHH ---  
--- -----CHHHHHH CCCC EEEEE CCCC EEEEEEEEEEE CCH HHHHHHHHHHHHHHHHHH -CCCCCCCCCCCCC EEEEE CCE EEEEEEH HHHHHHCHHHHHH C C C-  
--C HHHHHHHHHHHHHHHHHH CCCC EEEEE CCCC EEEEEEEEEEE CCH HHHHHHHHHHHHHHHHHH -CCCCCCCCCCCCC EEEEE CCE EEEEEEH HHHHHHCHHHHHH C C C  
--C HHHHHHHHHHHHHHHHHH CCCC EEEEE CCCC EEEEEEEEEEE CCH HHHHHHHHHHHHHHHHHH -CCCCCCCCCCCCC EEEEE CCE EEEEEEH HHHHHHCHHHHHH --C C-  
--C HHHHHHHHHHHHHHHHHH CCCC EEEEE CCCC EEEEEEEEEEE CCH HHHHHHHHHHHHHHHHHH -CCCCCCCCCCCCC EEEEE CCE EEEEEEH HHHHHHCHHHHHH --C C-  
CCH HHHHHHHHHHHHHHHHHH CCCC EEEEE CCCC EEEEEEEEEEE CCH HHHHHHHHHHHHHHHHHH HCCCCCCCCCCCCC EEEEE CCE EEEEEEH HHHHHHCHHHHHH C C C-  
HHH HHHHHHHHHHHHHHHHHH CCCC EEEEE CCCC EEEEEEEEEEE CCH HHHHHHHHHHHHHHHHHH -CCCCCCCCCCCCC EEEEE CCE EEEEEEH HHHHHHCHHHHHH C C-  
--C HHHHHHHHHHHHHHHHHH CCCC EEEEE CCCC EEEEEEEEEEE CCH HHHHHHHHHHHHHHHHHH -CCCCCCCCCCCCC EEEEE CCE EEEEEEH HHHHHHCHHHHHH --C C-  
--C HHHHHHHHHHHHHHHHHH CCCC EEEEE CCCC EEEEEEEEEEE CCH HHHHHHHHHHHHHHHHHH -CCCCCECC CCCC EEEEE CCE EEEEEEH HHHHHHCHHHHHH --C C-  
--C HHHHHHHHHHHHHHHHHH CCCC EEEEE CCCC EEEEEEEEEEE CCH HHHHHHHHHHHHHHHHHH -CCCCCECC CCCC EEEEE CCE EEEEEEH HHHHHHCHHHHHH --C C-
```
