# Supplementary material for: Comparative Bacterial Proteomics: Analysis of the Core Genome Concept
Source: PubMed Central journal article supplement (PMC2213561; doi:10.1371/journal.pone.0001542), 2008-02-06
Supplement: pone.0001542.s002.pdf [file pone.0001542.s002.pdf]

**Table S1.** Core proteins described as having a general functional characterization or no functional characterization.

| Protein                   | Organism                           | Approximate DNA Coordinates | Locus Tag* | Gene Associated Description                           |
|---------------------------|------------------------------------|-----------------------------|------------|-------------------------------------------------------|
| prot31 (Unknown Function) | <i>Arthrobacter sp.</i> FB24       | 2676632...2678221 (-)       | Arth_2389  | GTP1/OBG subdomain PFAM                               |
|                           | <i>C. crescentus</i> CB15          | 331907...332971 (-)         | CC0315     | GTP-binding protein CgtA                              |
|                           | <i>D. radiodurans</i> R1           | 86474...87790 (-)           | DR0084     | GTP-binding protein Obg                               |
|                           | <i>D. desulfuricans</i> G20        | 2696935...2698218 (-)       | Dde_2690   | GTP-binding protein, GTP1/OBG family                  |
|                           | <i>D. vulgaris</i> Hilldenborough  | 1018596...1019696 (+)       | DVU0929    | GTP-binding protein, GTP1/OBG family                  |
|                           | <i>G. metallireducens</i> GS-15    | 3597639...3598655 (+)       | Gmet_3197  | GTP-binding protein, GTP1/OBG family                  |
|                           | <i>G. sulfurreducens</i> PCA       | 3519000...3520016 (-)       | GSU3213    | GTP-binding protein, GTP1/OBG family                  |
|                           | <i>P. fluorescens</i> PfO-1        | 5477922...5479145 (-)       | Pfl_4858   | GTP-binding protein, GTP1/Obg family                  |
|                           | <i>P. ubique</i> HTC1062           | 221539...222522 (+)         | SAR11_0222 | GTP-binding protein                                   |
|                           | <i>R. sphaeroides</i> 2.4.1        | 17904...18932 (+)           | RSP3822    | ATP/GTP-binding site motif A (P-loop):GTP1/OBG family |
|                           | <i>S. oneidensis</i> MR-1          | 3805701...3806867 (-)       | SO3649     | GTP-binding protein, GTP1/Obg family                  |
|                           | <i>S. typhi</i> TY2                | 3310236...3311408 (-)       | t3218      | Probable GTP-binding protein                          |
|                           | <i>S. typhimurium</i> LT2          | 3470219...3471391           | STM3301    | Putative GTP-binding protein                          |
|                           | <i>Synechocystis sp.</i> PCC6803   | 397037...398143 (+)         | slr1090    | GTP-binding protein                                   |
|                           | <i>Y. enterocolitica</i>           | 489388...490560 (+)         | YE0421     | Putative GTP-binding factor                           |
|                           | <i>Y. pestis</i> KIM               | 758194...759366 (+)         | y0675      | Putative GTP-binding factor                           |
|                           | <i>Y. pseudotuberculosis</i> YPIII | 551563...552735 (+)         | YPTB0467   | Putative GTP-binding protein                          |
| prot36 (Unknown Function) | <i>Arthrobacter sp.</i> FB24       | 2671314...2671715 (-)       | Arth_2383  | Iojap-related protein TIGR                            |
|                           | <i>C. crescentus</i> CB15          | 3676177...3676518 (+)       | CC3432     | Iojap-related protein                                 |
|                           | <i>D. radiodurans</i> R1           | 2588246...2588596 (-)       | DR2580     | conserved hypothetical protein                        |
|                           | <i>D. desulfuricans</i> G20        | 1813661...1814056 (+)       | Dde_1756   | Iojap-related protein                                 |
|                           | <i>D. vulgaris</i> Hilldenborough  | 1702850...1703254 (+)       | DVU1618    | Iojap-related protein                                 |
|                           | <i>G. metallireducens</i> GS-15    | 3601811...3602206 (+)       | Gmet_3201  | Iojap-related protein                                 |
|                           | <i>G. sulfurreducens</i> PCA       | 3515275...3515670 (-)       | GSU3209    | Iojap-related protein                                 |
|                           | <i>P. fluorescens</i> PfO-1        | 5600475...5600969 (-)       | Pfl_4972   | Hypothetical protein                                  |
|                           | <i>P. ubique</i> HTC1062           | 225411...225761 (+)         | SAR11_0226 | Iojap-related protein                                 |
|                           | <i>R. sphaeroides</i> 2.4.1        | 2616422...2616742 (+)       | RSP0865    | Iojap protein family                                  |
|                           | <i>S. oneidensis</i> MR-1          | 1213093...1213422 (-)       | SO1170     | Iojap domain protein                                  |
|                           | <i>S. typhi</i> TY2                | 2291579...2291896 (+)       | t2225      | Conserved hypothetical protein (ybeB)                 |
|                           | <i>S. typhimurium</i> LT2          | 704426...704743 (-)         | STM0642    | Homolog of plant Iojap protein (ybeB)                 |
|                           | <i>Synechocystis sp.</i> PCC6803   | 1245395...1245859 (+)       | slr1886    | Hypothetical protein                                  |
|                           | <i>Y. enterocolitica</i> **        | 3271557...3271874 (+)       | YE3000     | Hypothetical protein                                  |

|                                   |                                    |                              |                       |                                                      |
|-----------------------------------|------------------------------------|------------------------------|-----------------------|------------------------------------------------------|
| prof325 (Hypothetical Protein)    | <i>Y. pestis</i> KIM**             | 1324183...1324500 (-)        | y1180                 | Hypothetical protein                                 |
|                                   | <i>Y. pseudotuberculosis</i> YPIII | 1316981...1317298 (-)        | YPTB1099              | Conserved hypothetical protein                       |
|                                   | <i>Arthrobacter</i> sp. FB24       | 2513295...2514071 (-)        | Arth_2234             | Conserved hypothetical protein                       |
|                                   | <i>C. crescentus</i> CB15          | 3658975...3659691 (-)        | CC3415                | Conserved hypothetical protein                       |
|                                   | <i>D. radiodurans</i> R1           | 1535576...1536304 (-)        | DR1520                | Conserved hypothetical protein                       |
|                                   | <i>D. desulfuricans</i> G20        | 2040355...2041071 (+)        | Dde_1997              | Conserved hypothetical protein                       |
|                                   | <i>D. vulgaris</i> Hilldenborough  | 1764117...1764866 (+)        | DVU1685               | Conserved hypothetical protein                       |
|                                   | <i>G. metallireducens</i> GS-15    | 3800542...3801733 (+)        | Gmet_3387             | Conserved hypothetical protein                       |
|                                   | <i>G. sulfurreducens</i> PCA       | 477066...477848 (-)          | GSU0446               | Conserved hypothetical protein                       |
|                                   | <i>P. fluorescens</i> PfO-1        | 5951311...5952030 (+)        | Pfl_5288              | Hypothetical protein                                 |
|                                   | <i>P. ubique</i> HTC1062**         | 143525...144226 (-)          | SAR11_0136            | Conserved hypothetical protein                       |
|                                   | <i>R. sphaeroides</i> 2.4.1        | 2765413...2766186 (-)        | RSP1007               | Conserved hypothetical protein                       |
|                                   | <i>S. oneidensis</i> MR-1          | 850577...851308 (-)          | S0832                 | Conserved hypothetical proteins                      |
|                                   | <i>S. typhi</i> TY2                | 3097369...3098100 (+)        | t3006                 | Conserved hypothetical protein                       |
|                                   | <i>S. typhimurium</i> LT2          | 3256140...3256919 (+)        | STM3094               | Putative cytoplasmic protein (yggJ)                  |
|                                   | <i>Synechocystis</i> sp. PCC6803   | 108290...109201 (+)          | slr0722               | Hypothetical protein                                 |
|                                   | <i>Y. enterocolitica</i>           | 3740817...3741548 (+)        | YE426                 | Hypothetical protein                                 |
|                                   | <i>Y. pestis</i> KIM**             | 3654517...3655248 (+)        | y3320                 | Hypothetical protein                                 |
|                                   | <i>Y. pseudotuberculosis</i> YPIII | 3772297...3773028 (+)        | YPTB3206              | Conserved hypothetical protein                       |
|                                   | prof330 (Unknown Function)         | <i>Arthrobacter</i> sp. FB24 | 2519298...2521151 (-) | Arth_2240                                            |
| <i>C. crescentus</i> CB15         |                                    | 1165328...1167274 (-)        | CC1034                | GTP-binding protein LepA                             |
| <i>D. radiodurans</i> R1          |                                    | 1153825...1155645 (-)        | DR1145                | GTP-binding elongation factor family protein LepA    |
| <i>D. desulfuricans</i> G20       |                                    | 2802606...2804411 (-)        | Dde_2817              | Small GTP-binding protein domain:GTP-binding protein |
| <i>D. vulgaris</i> Hilldenborough |                                    | 782190...783995 (+)          | DVU0703               | GTP-binding protein LepA                             |
| <i>G. metallireducens</i> GS-15   |                                    | 1980477...1982366 (+)        | Gmet_1766             | GTP-binding protein LepA                             |
| <i>G. sulfurreducens</i> PCA      |                                    | 1377368...1379170 (+)        | GSU1266               | GTP-binding protein LepA                             |
| <i>P. fluorescens</i> PfO-1       |                                    | 1153445...1155241 (+)        | Pfl_0992              | GTP-binding protein lepA                             |
| <i>P. ubique</i> HTC1062          |                                    | 438405...440213 (+)          | SAR11_0444            | GTP-Binding protein lepA                             |
| <i>R. sphaeroides</i> 2.4.1       |                                    | 681644...683443 (-)          | RSP2088               | GTP-binding elongation factor                        |
| <i>S. oneidensis</i> MR-1         |                                    | 1402041...1403831 (+)        | SO1346                | GTP-binding protein (LepA)                           |
| <i>S. typhi</i> TY2               |                                    | 312191...313990 (+)          | t0274                 | GTP-binding protein LepA                             |
| <i>S. typhimurium</i> LT2         |                                    | 2726772...2728571 (-)        | STM2583               | GTP-binding elongation factor (lepA)                 |
| <i>Synechocystis</i> sp. PCC6803  |                                    | 3564838...3566649 (+)        | slr0604               | GTP-binding protein                                  |
| <i>Y. enterocolitica</i>          |                                    | 1134410...1136209 (+)        | YE1015                | GTP-binding elongation factor (lepA)                 |
| <i>Y. pestis</i> KIM              |                                    | 1438342...1440141 (+)        | y1295                 | GTP-binding elongation factor (lepA)                 |

|                                |                                    |                        |            |                                                          |
|--------------------------------|------------------------------------|------------------------|------------|----------------------------------------------------------|
|                                | <i>Y. pseudotuberculosis</i> YPIII | 3422285...3424084 (-)  | YPTB1099   | Putative GTP-binding elongation factor (lepA)            |
| prof371 (Hypothetical Protein) | <i>Arthrobacter</i> sp. FB24       | 2593536...2594291 (-)  | Arth_2304  | Protein of unknown function DUF28                        |
|                                | <i>C. crescentus</i> CB15          | 3504459...3505214 (-)  | CC3243     | Conserved hypothetical protein                           |
|                                | <i>D. radiodurans</i> R1           | 2550845...2551579 (-)  | DR2548     | Conserved hypothetical protein                           |
|                                | <i>D. desulfuricans</i> G20        | 2342035...2342781 (-)  | Dde_2325   | Protein of unknown function DUF28                        |
|                                | <i>D. vulgaris</i> Hilddenborough  | 2352787...2353530 (-)  | DVU2259    | Conserved hypothetical protein                           |
|                                | <i>G. metallireducens</i> GS-15    | 817626...818369 (+)    | Gmet_0743  | Hypothetical protein                                     |
|                                | <i>G. sulfurreducens</i> PCA       | 1163086...1163829 (+)  | GSU1074    | Conserved hypothetical protein                           |
|                                | <i>P. fluorescens</i> PfO-1        | 4969166...4969912 (-)  | Pfl_4410   | Hypothetical UPF0082 protein                             |
|                                | <i>P. ubique</i> HTC1062           | 578863...579588 (+)    | SAR11_0592 | Domain of unknown function DUF28                         |
|                                | <i>R. sphaeroides</i> 2.4.1        | 2393628...2394374 (-)  | RSP0655    | Conserved hypothetical                                   |
|                                | <i>S. oneidensis</i> MR-1          | 2540604...2541350 (-)  | SO2432     | Expressed protein of unknown function DUF28              |
|                                | <i>S. typhi</i> TY2                | 1066996...1067736 (+)  | t0978      | Conserved hypothetical protein (yebC)                    |
|                                | <i>S. typhimurium</i> LT2          | 1993786...1994526 (-)  | STM1899    | Putative cytoplasmic protein (yebC)                      |
|                                | <i>Synechocystis</i> sp. PCC6803** | 22572036...2257964 (+) | slr0989    | Hypothetical protein                                     |
|                                | <i>Y. enterocolitica</i>           | 2583739...2584482 (-)  | YE2395     | Hypothetical protein                                     |
|                                | <i>Y. pestis</i> KIM               | 2484824...2485579 (-)  | y2255      | Hypothetical protein                                     |
|                                | <i>Y. pseudotuberculosis</i> YPIII | 2402812...2403555      | YPTB2038   | Conserved hypothetical protein                           |
| prof738 (Hypothetical Protein) | <i>Arthrobacter</i> sp. FB24       | 2809834...2810412 (+)  | Arth_2509  | Putative methyltransferase                               |
|                                | <i>C. crescentus</i> CB15          | 243490...244056 (-)    | CC0227     | Conserved hypothetical protein                           |
|                                | <i>D. radiodurans</i> R1           | 655597...656157 (-)    | DR0643     | N-6 adenine-specific DNA restriction methylase, Putative |
|                                | <i>D. desulfuricans</i> G20        | 1834501...1835070 (+)  | Dde_1782   | Conserved hypothetical protein                           |
|                                | <i>D. vulgaris</i> Hilddenborough  | 1599751...1600323 (+)  | DVU1531    | Methyltransferase, Putative                              |
|                                | <i>G. metallireducens</i> GS-15    | 1974741...1975307 (-)  | Gmet_1760  | Hypothetical protein                                     |
|                                | <i>G. sulfurreducens</i> PCA       | 1345954...1346517 (-)  | GSU1244    | Methyltransferase, Putative                              |
|                                | <i>P. fluorescens</i> PfO-1        | 6000676...6001284 (+)  | Pfl_5340   | Methyltransferase, Putative                              |
|                                | <i>P. ubique</i> HTC1062           | 157024...157590 (+)    | SAR11_0154 | N6-adenine-specific methylase                            |
|                                | <i>R. sphaeroides</i> 2.4.1        | 2651080...2651634 (+)  | RSP0901    | N-6 Adenine-specific DNA methylase                       |
|                                | <i>S. oneidensis</i> MR-1          | 4782794...4783441 (+)  | SO4587     | Putative methylase involved in ubiquinone biosynthesis   |
|                                | <i>S. typhi</i> TY2                | 4089701...4090297 (-)  | t3950      | Conserved hypothetical protein                           |
|                                | <i>S. typhimurium</i> LT2          | 3740347...3740943 (+)  | STM3572    | Putative methyltransferase                               |
|                                | <i>Synechocystis</i> sp. PCC6803** | 2385351...2385911 (+)  | slr0383    | Hypothetical protein                                     |
|                                | <i>Y. enterocolitica</i> **        | 259672...260226 (-)    | YE0224     | Hypothetical protein                                     |
|                                | <i>Y. pestis</i> KIM**             | 463268...463930 (-)    | y0415      | Hypothetical protein                                     |

|                                    |                                    |                       |                                                  |                                                                  |
|------------------------------------|------------------------------------|-----------------------|--------------------------------------------------|------------------------------------------------------------------|
| prof774 (Unknown Function)         | <i>Y. pseudotuberculosis</i> YPIII | 262318...262980 (-)   | YPTB0220                                         | Conserved hypothetical protein                                   |
|                                    | <i>Arthrobacter</i> sp. FB24       | 2896748..2897452 (-)  | Arth_2580                                        | Ham1-like protein TIGR                                           |
|                                    | <i>C. crescentus</i> CB15          | 156966...157550 (-)   | CC0146                                           | Ham1 family protein                                              |
|                                    | <i>D. radiodurans</i> R1           | 179684...180286 (+)   | DR0179                                           | Conserved hypothetical protein                                   |
|                                    | <i>D. desulfuricans</i> G20        | 511225...511854 (-)   | Dde_0504                                         | Ham1-like protein                                                |
|                                    | <i>D. vulgaris</i> Hilldenborough  | 3307131...3307754 (+) | DVU3154                                          | HAM1 family protein                                              |
|                                    | <i>G. metallireducens</i> GS-15    | 2090602...2091192 (-) | Gmet_1875                                        | HAM1-like protein                                                |
|                                    | <i>G. sulfurreducens</i> PCA       | 1960195...1960794 (-) | GSU1794                                          | HAM1 protein                                                     |
|                                    | <i>P. fluorescens</i> PfO-1        | 5487966...5988562 (+) | Pfl_5326                                         | HAM1 protein homolog                                             |
|                                    | <i>P. ubique</i> HTC1062           | 361572...362174 (+)   | SAR11_0370                                       | HAM1 protein homolog                                             |
|                                    | <i>R. sphaeroides</i> 2.4.1        | 2994982...2995593 (+) | RSP1222                                          | Putative Ham1p_like, Ham1 family                                 |
|                                    | <i>S. oneidensis</i> MR-1          | 3500363...3500980 (+) | SO3358                                           | Non-canonical purine NTP pyrophosphatase, rdgB/HAM1              |
|                                    | <i>S. typhi</i> TY2                | 3103707...3104300 (+) | t3015                                            | Conserved hypothetical protein                                   |
|                                    | <i>S. typhimurium</i> LT2          | 3262528...3263121 (+) | STM3103                                          | Putative Xanthosine triphosphate pyrophosphatase                 |
|                                    | <i>Synechocystis</i> sp. PCC6803   | 2151606...2152190 (+) | slr0402                                          | Hypothetical protein                                             |
|                                    | <i>Y. enterocolitica</i>           | 3750245...3750838 (+) | YE3437                                           | Putative ribosomal protein                                       |
|                                    | <i>Y. pestis</i> KIM               | 3663573...3664244 (+) | y3331                                            | Putative ribosomal protein                                       |
| <i>Y. pseudotuberculosis</i> YPIII | 3781431...3782024 (+)              | YPTB3217              | Possible Xanthosine triphosphate pyrophosphatase |                                                                  |
| prof901 (Regulatory Function)      | <i>Arthrobacter</i> sp. FB24       | 3165359..3167287 (-)  | Arth_2817                                        | Small GTP-binding protein domain:GTP-binding protein (TypA_BipA) |
|                                    | <i>C. crescentus</i> CB15          | 811916...813748 (-)   | CC0741                                           | elongation factor Tu family protein                              |
|                                    | <i>D. radiodurans</i> R1           | 1206001...1207782 (-) | DR1198                                           | GTP-binding elongation factor family protein TypA/BipA           |
|                                    | <i>D. desulfuricans</i> G20        | 1551395...1553239 (-) | Dde_1533                                         | Small GTP-binding protein domain:GTP-binding protein TypA        |
|                                    | <i>D. vulgaris</i> Hilldenborough  | 2323364...2325205 (+) | DVU2231                                          | GTP-binding protein TypA                                         |
|                                    | <i>G. metallireducens</i> GS-15    | 3397598...3399394 (+) | Gmet_3013                                        | GTP-binding protein                                              |
|                                    | <i>G. sulfurreducens</i> PCA       | 533056...534852 (+)   | GSU0500                                          | GTP-binding protein TypA                                         |
|                                    | <i>P. fluorescens</i> PfO-1        | 391491...393311 (+)   | Pfl_0347                                         | GTP-binding protein TypA/BipA                                    |
|                                    | <i>P. ubique</i> HTC1062           | 168376...170202 (+)   | SAR11_0165                                       | GTP-binding protein, TypA                                        |
|                                    | <i>R. sphaeroides</i> 2.4.1        | 2178615...2180435 (+) | RSP0448                                          | EF-Tu; elongation factor Tu                                      |
|                                    | <i>S. oneidensis</i> MR-1          | 4600874...4602685 (-) | SO4408                                           | virulence regulator BipA                                         |
|                                    | <i>S. typhi</i> TY2                | 3711782...3713605 (-) | t3613                                            | GTP-binding elongation factor family protein (typA)              |
|                                    | <i>S. typhimurium</i> LT2          | 4217384...4219207 (+) | STM4009                                          | GTP-binding protein (typA)                                       |
|                                    | <i>Synechocystis</i> sp. PCC6803   | 204604...206397 (+)   | slr1105                                          | GTP-binding protein TypA/BipA                                    |
|                                    | <i>Y. enterocolitica</i>           | 38529...40352 (+)     | YE0029                                           | Putative GTP-binding factor                                      |
|                                    | <i>Y. pestis</i> KIM               | 4221887...4223710 (-) | y3803                                            | Putative GTP-binding factor                                      |

prot902 (Hypothetical Protein)

|                                    |                       |            |                                               |
|------------------------------------|-----------------------|------------|-----------------------------------------------|
| <i>Y. pseudotuberculosis</i> YPIII | 34478...36301 (+)     | YPTB0025   | Putative GTPase (bipA)                        |
| <i>Arthrobacter</i> sp. FB24       | 3185803...3186909 (-) | Arth_2831  | GTP-binding protein YchF                      |
| <i>C. crescentus</i> CB15          | 499915...501015 (-)   | CC0479     | GTP-binding protein, YchF family              |
| <i>D. radiodurans</i> R1           | 1391767...1392864 (+) | DR1386     | conserved hypothetical protein                |
| <i>D. desulfuricans</i> G20        | 1752704...1753804 (-) | Dde_1698   | Conserved hypothetical protein                |
| <i>D. vulgaris</i> Hilldenborough  | 1503735...1504835 (-) | DVU1429    | GTP-binding protein                           |
| <i>G. metallireducens</i> GS-15    | 3223418...3224512 (-) | Gmet_2845  | GTP-binding protein                           |
| <i>G. sulfurreducens</i> PCA       | 700226...701320 (+)   | GSU0664    | GTP binding protein YchF                      |
| <i>P. fluorescens</i> PfO-1        | 5359504...5360604 (+) | Pfl_4756   | GTP-binding protein YchF                      |
| <i>P. ubique</i> HTC1062           | 109411...110484 (+)   | SAR11_0097 | Predicted GTPase, Probable translation factor |
| <i>R. sphaeroides</i> 2.4.1        | 2577892...2578989 (+) | RSP0832    | Putative GTP-binding protein                  |
| <i>S. oneidensis</i> MR-1          | 1228241...1229332 (+) | SO1185     | GTPase/translation factor                     |
| <i>S. typhi</i> TY2                | 1176621...1177712 (-) | t1092      | Putative ATP/GTP-binding protein              |
| <i>S. typhimurium</i> LT2          | 1881818...1882909 (+) | STM1784    | Putative GTP-binding protein                  |
| <i>Synechocystis</i> sp. PCC6803   | 1520009...1521100 (-) | sll0245    | Probable GTP binding protein                  |
| <i>Y. enterocolitica</i>           | 2629139...2630230 (+) | YE2439     | Putative GTP-binding protein                  |
| <i>Y. pestis</i> KIM               | 2533619...2534710 (+) | y2298      | Putative GTP-binding protein                  |
| <i>Y. pseudotuberculosis</i> YPIII | 2354015...2355106 (-) | YPTB3217   | Conserved hypothetical protein                |

prot1177 (Hypothetical Protein)

|                                    |                        |            |                                                |
|------------------------------------|------------------------|------------|------------------------------------------------|
| <i>Arthrobacter</i> sp. FB24       | 1311164...1312177 (+)  | Arth_1206  | Protein of unknown function UPF0011 TIGR       |
| <i>C. crescentus</i> CB15          | 154912...155784 (-)    | CC0144     | Tetrapyrrole methylase family protein          |
| <i>D. radiodurans</i> R1           | 650694...651653 (-)    | DR0636     | Conserved hypothetical protein                 |
| <i>D. desulfuricans</i> G20        | 1122376...1123209 (-)  | Dde_1092   | Protein of unknown function UPF0011            |
| <i>D. vulgaris</i> Hilldenborough  | 922377...923204 (-)    | DVU0832    | Tetrapyrrole methylase family protein          |
| <i>G. metallireducens</i> GS-15    | 3246398...3247246 (-)  | Gmet_2861  | Hypothetical protein                           |
| <i>G. sulfurreducens</i> PCA       | 683565...684425 (+)    | GSU0653    | Tetrapyrrole methylase family protein          |
| <i>P. fluorescens</i> PfO-1        | 1348994...1347876 (-)  | Pfl_4683   | Decarboxylase family protein                   |
| <i>P. ubique</i> HTC1062           | 363342...364205 (+)    | SAR11_0372 | Possible methylase or methyltransferase        |
| <i>R. sphaeroides</i> 2.4.1        | 401856...402743 (+)    | RSP1813    | Conserved hypothetical protein                 |
| <i>S. oneidensis</i> MR-1          | 306578...307423 (+)    | SO0301     | Methyltransferase                              |
| <i>S. typhi</i> TY2                | 3275053...3275916 (-)  | t3183      | Conserved hypothetical protein                 |
| <i>S. typhimurium</i> LT2          | 3432400...3433263 (-)  | STM3263    | Putative methyltransferase                     |
| <i>Synechocystis</i> sp. PCC6803   | 1691493...1692332 (-)  | sll0818    | Tetrapyrrole methylase family protein          |
| <i>Y. enterocolitica</i>           | 4067751...4068650 (-)  | YE3726     | Hypothetical protein                           |
| <i>Y. pestis</i> KIM**             | 125918...126817 (-)    | y0117      | Hypothetical protein                           |
| <i>Y. pseudotuberculosis</i> YPIII | 41575324...4158423 (-) | YPTB3492   | Possible tetrapyrrole methylase family protein |

\*<http://img.jgi.doe.gov/cgi-bin/pub/main.cgi>; \*\*Not observed
