# Supplementary material for: Comparative Bacterial Proteomics: Analysis of the Core Genome Concept
Source: PubMed Central journal article supplement (PMC2213561; doi:10.1371/journal.pone.0001542), 2008-02-06
Supplement: pone.0001542.s003.pdf [file pone.0001542.s003.pdf]

**Table S2.** Conserved proteins from different sub-sets of bacteria relative to *S. typhimurium*.

| Gene Associated Description                                                                             | Symbol |
|---------------------------------------------------------------------------------------------------------|--------|
| <b><i>Salmonella</i> species and <i>Yersinia</i> species</b>                                            |        |
| <i>S. typhimurium</i> : putative outer membrane lipoprotein                                             | YjeL   |
| <i>S. typhimurium</i> : putative cytoplasmic protein                                                    | YihD   |
| <i>S. typhimurium</i> : putative hydrolase of the HAD superfamily                                       | YigL   |
| <i>S. typhimurium</i> : putative inner membrane protein                                                 | YicH   |
| <i>S. typhimurium</i> : putative outer membrane lipoprotein                                             | YiaF   |
| <i>S. typhimurium</i> : putative periplasmic protein                                                    | YhcB   |
| <i>S. typhimurium</i> : putative outer membrane protein                                                 | YgiW   |
| <i>S. typhimurium</i> : putative tRNA/rRNA methyltransferase                                            | YfiF   |
| <i>S. typhimurium</i> : putative formate acetyltransferase                                              | YfiD   |
| <i>S. typhimurium</i> : putative transcriptional regulator of two-component regulator protein           | YfhG   |
| <i>S. typhimurium</i> : putative cytoplasmic protein                                                    | YeeX   |
| <i>S. typhimurium</i> : putative periplasmic protein                                                    | YdgH   |
| <i>S. typhimurium</i> : putative cytoplasmic protein                                                    | YciN   |
| <i>S. typhimurium</i> : putative lipoprotein                                                            | YbjP   |
| <i>S. typhimurium</i> : putative cytoplasmic protein                                                    | YbiU   |
| <i>S. typhimurium</i> : putative hydrolase of the alpha/beta superfamily                                | YafA   |
| <i>S. typhimurium</i> : putative cytoplasmic protein                                                    | YaeH   |
| <i>S. typhimurium</i> : modulator of enterobacterial common antigen                                     | WzzE   |
| <i>S. typhimurium</i> : CDP-diacylglycerol phosphotidylhydrolase                                        | UshB   |
| <i>S. typhimurium</i> : vancomycin sensitivity                                                          | SanA   |
| <i>S. typhimurium</i> : putative fimbriae usher                                                         | SafC   |
| <i>S. typhimurium</i> : putative fimbriae assembly chaparone                                            | SafB   |
| <i>S. typhimurium</i> : RNase II, mRNA degradation                                                      | Rnb    |
| <i>S. typhimurium</i> : aspartate carbamoyltransferase, regulatory subunit                              | PyrL   |
| <i>S. typhimurium</i> : outer membrane protease, receptor for phage OX2                                 | OmpX   |
| <i>S. typhimurium</i> : ABC superfamily                                                                 | MglB   |
| <i>S. typhimurium</i> : Sugar Specific PTS family, mannose-specific enzyme IIC                          | ManY   |
| <i>S. typhimurium</i> : Sugar Specific PTS family, mannose-specific enzyme IIAB                         | ManX   |
| <i>S. typhimurium</i> : periplasmic protein of mal regulon                                              | MalM   |
| <i>S. typhimurium</i> : GMP reductase                                                                   | GuaC   |
| <i>S. typhimurium</i> : phosphoenolpyruvate-dependent sugar phosphotransferase system, EIIA 2           | FruF   |
| <i>S. typhimurium</i> : membrane protein                                                                | DamX   |
| <i>S. typhimurium</i> : 6-phospho-beta-glucosidase A                                                    | BglA   |
| <i>S. typhimurium</i> : asparagine synthetase A                                                         | AsnA   |
| <i>S. typhimurium</i> : ABC superfamily                                                                 | ArtP   |
| <i>S. typhimurium</i> : putative secreted protein                                                       |        |
| <i>S. typhimurium</i> : putative periplasmic transport protein                                          |        |
| <i>S. typhimurium</i> : putative outer membrane lipoprotein                                             |        |
| <i>S. typhimurium</i> : putative inner membrane protein                                                 |        |
| <i>S. typhimurium</i> : putative inner membrane lipoprotein                                             |        |
| <b><i>Salmonella</i> species, <i>Yersinia</i> species, and <i>Shewanella oneidensis</i> MR1</b>         |        |
| <i>S. oneidensis</i> MR-1: activator of ProP osmoprotectant transporter                                 | ProQ   |
| <i>S. oneidensis</i> MR-1: aldehyde-alcohol dehydrogenase                                               | AdhE   |
| <i>S. oneidensis</i> MR-1: bifunctional aspartokinase II/homoserine dehydrogenase, methionine-sensitive | MetL   |

|                                                                       |      |
|-----------------------------------------------------------------------|------|
| S.oneidensis MR-1: cell division protein                              | ZipA |
| S.oneidensis MR-1: DNA-binding protein, H-NS family                   |      |
| S.oneidensis MR-1: DUF1439 family lipoprotein complement              |      |
| S.oneidensis MR-1: expressed lipoprotein                              |      |
| S.oneidensis MR-1: expressed lipoprotein                              | NlpB |
| S.oneidensis MR-1: expressed protein                                  |      |
| S.oneidensis MR-1: expressed protein complement                       |      |
| S.oneidensis MR-1: expressed protein of unknown function DUF1260      |      |
| S.oneidensis MR-1: expressed protein of unknown function DUF1342      |      |
| S.oneidensis MR-1: expressed protein of unknown function DUF1414      |      |
| S.oneidensis MR-1: expressed protein of unknown function DUF1451      |      |
| S.oneidensis MR-1: FKBP-type peptidyl-prolyl ci-trans isomerase       | FkpA |
| S.oneidensis MR-1: formate acetyltransferase                          | PlfB |
| S.oneidensis MR-1: inner membrane sulphatase-like protein complement  |      |
| S.oneidensis MR-1: outer membrane MipA family protein                 | MipA |
| S.oneidensis MR-1: outer membrane YfaZ beta barrel family protein     | YfaZ |
| S.oneidensis MR-1: PTS system glucose-specific IIBC component         | PtsG |
| S.oneidensis MR-1: pyruvate formate-lyase 1 activating enzyme         | PflA |
| S.oneidensis MR-1: rare lipoprotein B complement                      |      |
| S.oneidensis MR-1: ribosomal protein L25                              | RplY |
| S.oneidensis MR-1: small conductance mechanosensitive ion channel     | MscS |
| S.oneidensis MR-1: subfamily M16A unassigned peptidases               |      |
| S.oneidensis MR-1: transcriptional regulator of fatty acid metabolism | FadR |

---

\* The name of the organism at the beginning of each description indicates the annotation used to describe each protein.
