# Supplementary material for: Comparative Bacterial Proteomics: Analysis of the Core Genome Concept
Source: PLoS One. 2008 Feb 6;3(2):e1542. doi: 10.1371/journal.pone.0001542 (PMC2213561; doi:10.1371/journal.pone.0001542)
Supplement: Table S3 — Core proteome proteins observed in E. coli K12 MG1655 and S. typhimurium and their published genes noted as essential. (Source: Gerdes, et al. 2003. J. Bacteriol. 185(19):5673–5684; Knuth, et al. 2004. Mol Microbiol. 51(6):1729–1744) (0.25 MB PDF) [file pone.0001542.s004.pdf]

**Table S3.** Core proteome proteins observed in *E. coli* K12 MG1655 and *S. typhimurium* and their published genes noted as essential. (Source: Gerdes, et al. 2003. *J. Bacteriol.* 185(19):5673-5684; Knuth, et al. 2004. *Mol Microbiol.* 51(6):1729-1744)

| Core Protein | <i>E. coli</i> Locus Tag | Essential in <i>E. coli</i> | <i>S. typhimurium</i> Locus Tag | Essential in <i>S. typhimurium</i> | Gene Symbol | Description                                                                                       |
|--------------|--------------------------|-----------------------------|---------------------------------|------------------------------------|-------------|---------------------------------------------------------------------------------------------------|
| prot2        | NT01EC2079               | X                           | STM1336                         |                                    | <i>rplT</i> | Ribosomal protein L20                                                                             |
| prot15       | NT01EC2458               |                             | STM2076                         |                                    | <i>hisA</i> | Phosphoribosylformimino-5-aminoimidazole carboxamide ribotide isomerase                           |
| prot29       | NT01EC3847               |                             | STM3304                         |                                    |             | Ribosomal protein L21 complement                                                                  |
| prot30       | NT01EC3846               |                             | STM3303                         |                                    |             | Ribosomal protein L27 complement                                                                  |
| prot31       | NT01EC3844               | X                           | STM3301                         |                                    |             | GTP-binding protein, GTP1/Obg family complement                                                   |
| prot33       | NT01EC0287               |                             | STM0322                         |                                    | <i>proA</i> | Gamma-glutamyl phosphate reductase                                                                |
| prot50       | NT01EC3354               | X                           | STM2953                         |                                    |             | CTP synthase complement                                                                           |
| prot107      | NT01EC1332               |                             | STM1195                         | X                                  | <i>fabG</i> | 3-oxoacyl-(acyl-carrier-protein) reductase                                                        |
| prot128      | NT01EC3262               |                             | STM2829                         |                                    | <i>recA</i> | RecA protein                                                                                      |
| prot176      | NT01EC2082               | X                           | STM1333                         | X                                  | <i>thrS</i> | Threonyl-tRNA synthetase                                                                          |
| prot180      | NT01EC3043               | X                           | STM2526                         |                                    | <i>ndk</i>  | Nucleoside diphosphate kinase                                                                     |
| prot182      | NT01EC0026               | X                           | STM0046                         | X                                  | <i>ileS</i> | Isoleucyl-tRNA synthetase complement                                                              |
| prot185      | NT01EC5208               | X                           | STM4475                         | X                                  | <i>clpX</i> | Valyl-tRNA synthetase                                                                             |
| prot186      | NT01EC0538               |                             | STM0449                         |                                    | <i>tig</i>  | ATP-dependent Clp protease, ATP-binding subunit                                                   |
| prot188      | NT01EC0534               |                             | STM0447                         |                                    |             | Trigger factor                                                                                    |
| prot203      | NT01EC1985               | X                           | STM1449                         | X                                  | <i>tyrS</i> | Tyrosyl-tRNA synthetase                                                                           |
| prot211      | NT01EC3831               |                             | STM3290                         |                                    | <i>argG</i> | Argininosuccinate synthase                                                                        |
| prot221      | NT01EC2075               |                             | STM1338                         | X                                  | <i>pheT</i> | Phenylalanyl-tRNA synthetase, beta subunit                                                        |
| prot222      | NT01EC2076               | X                           | STM1337                         |                                    | <i>pheS</i> | Phenylalanyl-tRNA synthetase, alpha subunit                                                       |
| prot326      | NT01EC0016               |                             | STM0013                         |                                    | <i>dnaJ</i> | Chaperone protein                                                                                 |
| prot330      | NT01EC3107               |                             | STM2583                         |                                    | <i>lepA</i> | GTP-binding protein                                                                               |
| prot334      | NT01EC0791               | X                           | STM0648                         |                                    | <i>leuS</i> | Leucyl-tRNA synthetase                                                                            |
| prot338      | NT01EC3555               | X                           | STM3090                         | X                                  | <i>metK</i> | S-adenosylmethionine synthetase                                                                   |
| prot339      | NT01EC4426               |                             | STM3730                         |                                    |             | Bifunctional 4-phosphopantothenoylecysteine decarboxylase/phosphopantothenoylecysteine synthetase |
| prot341      | NT01EC4437               | X                           | STM3740                         |                                    | <i>gmk</i>  | Guanylate kinase                                                                                  |
| prot342      | NT01EC0036               |                             | STM0067                         |                                    | <i>carB</i> | Carbamoyl-phosphate synthase, large subunit                                                       |
| prot345      | NT01EC5194               |                             | STM4460                         |                                    | <i>pyrB</i> | Aspartate carbamoyltransferase                                                                    |
| prot351      | NT01EC2823               |                             | STM2384                         |                                    | <i>aroC</i> | Chorismate synthase                                                                               |
| prot354      | NT01EC3260               | X                           | STM2827                         |                                    |             | Alanyl-tRNA synthetase complement                                                                 |

|         |            |   |         |   |              |                                                                                 |
|---------|------------|---|---------|---|--------------|---------------------------------------------------------------------------------|
| prot355 | NT01EC3982 |   | STM3416 |   | <i>rpsD</i>  | Ribosomal protein S4                                                            |
| prot361 | NT01EC2267 | X | STM1901 | X | <i>aspS</i>  | Aspartyl-tRNA synthetase                                                        |
| prot424 | NT01EC0113 | X | STM0133 | X | <i>ftsZ</i>  | Cell division protein                                                           |
| prot426 | NT01EC0109 | X | STM0129 |   |              | UDP-N-acetylmuramate--alanine ligase complement                                 |
| prot427 | NT01EC0108 | X | STM0128 | X | <i>murG</i>  | Undecaprenyldiphospho-muramoylpentapeptide beta-N-acetylglucosaminyltransferase |
| prot429 | NT01EC0106 | X | STM0126 |   |              | UDP-N-acetylmuramoylalanine--D-glutamate ligase complement                      |
| prot480 | NT01EC2459 |   | STM2077 |   | <i>hisF</i>  | Imidazole glycerol phosphate synthase, cyclase subunit                          |
| prot488 | NT01EC4095 | X | STM3483 |   | <i>rpe</i>   | Ribulose-phosphate 3-epimerase                                                  |
| prot490 | NT01EC3974 | X | STM3407 |   | <i>fnt</i>   | Methionyl-tRNA formyltransferase                                                |
| prot513 | NT01EC3536 | X | STM3069 |   | <i>pgk</i>   | Phosphoglycerate kinase                                                         |
| prot519 | NT01EC4946 |   | STM4254 |   | <i>uvrA</i>  | Excinuclease ABC, A subunit                                                     |
| prot526 | NT01EC4688 | X | STM3999 | X | <i>polA</i>  | DNA polymerase I                                                                |
| prot560 | NT01EC1549 | X | STM1714 |   | <i>topA</i>  | DNA topoisomerase I                                                             |
| prot578 | NT01EC4870 |   | STM4175 |   | <i>purD</i>  | Phosphoribosylamine-glycine ligase                                              |
| prot698 | NT01EC0645 | X | STM0537 |   | <i>cysS</i>  | Cysteiny-tRNA synthetase                                                        |
| prot714 | NT01EC1331 | X | STM1194 | X | <i>fabD</i>  | Malonyl CoA-acyl carrier protein transacylase                                   |
| prot723 | NT01EC3151 | X | STM2673 |   | <i>rplS</i>  | Ribosomal protein L19                                                           |
| prot729 | NT01EC3156 | X | STM2677 |   | <i>fth</i>   | Signal recognition particle protein                                             |
| prot749 | NT01EC2906 | X | STM2415 |   | <i>gltX</i>  | Glutamyl-tRNA synthetase                                                        |
| prot750 | NT01EC4581 |   | STM3903 |   | <i>llvE</i>  | Branched-chain-amino-acid transaminase                                          |
| prot752 | NT01EC2557 | X | STM2155 | X | <i>metG</i>  | Methionyl-tRNA synthetase                                                       |
| prot756 | NT01EC4582 |   | STM3904 |   | <i>llvD</i>  | Dihydroxy-acid dehydratase                                                      |
| prot774 | NT01EC3568 |   | STM3103 |   | <i>rdgB</i>  | Non-canonical purine NTP pyrophosphatase, rdgB/HAM1 family                      |
| prot789 | NT01EC1466 |   | STM1776 |   | <i>prfA</i>  | Peptide chain release factor 1, PrfA complement                                 |
| prot854 | NT01EC0116 | X | STM0136 |   | <i>secA</i>  | Preprotein translocase ATPase subunit                                           |
| prot879 | NT01EC4621 | X | STM3938 |   | <i>hemC</i>  | Hydroxymethylbilane synthase                                                    |
| prot901 | NT01EC4701 | X | STM4009 |   | <i>bipA</i>  | Virulence regulator BipA complement                                             |
| prot902 | NT01EC1457 |   | STM1784 |   |              | GTPase/translation factor                                                       |
| prot921 | NT01EC3031 |   | STM2510 |   |              | GMP synthase complement                                                         |
| prot926 | NT01EC5065 |   | STM4329 |   | <i>groES</i> | Chaperonin (GroES)                                                              |
| prot942 | NT01EC3902 | X | STM3344 |   | <i>rpsI</i>  | Ribosomal protein S9                                                            |
| prot943 | NT01EC3903 | X | STM3345 |   | <i>rplM</i>  | Ribosomal protein L13                                                           |
| prot953 | NT01EC3981 | X | STM3415 | X | <i>rpoA</i>  | DNA-directed RNA polymerase, alpha subunit                                      |

|          |            |   |         |   |             |                                                                                                           |
|----------|------------|---|---------|---|-------------|-----------------------------------------------------------------------------------------------------------|
| prot954  | NT01EC3983 |   | STM3417 |   | <i>rpsK</i> | Ribosomal protein S11                                                                                     |
| prot955  | NT01EC3984 |   | STM3418 |   | <i>rpsM</i> | Ribosomal protein S13                                                                                     |
| prot960  | NT01EC3987 | X | STM3421 | X | <i>rplO</i> | Ribosomal protein L15                                                                                     |
| prot962  | NT01EC3990 | X | STM3423 | X | <i>rpsE</i> | Ribosomal protein S5                                                                                      |
| prot963  | NT01EC3991 | X | STM3424 |   | <i>rplR</i> | Ribosomal protein L18                                                                                     |
| prot964  | NT01EC3993 | X | STM3425 | X | <i>rplF</i> | Ribosomal protein L6                                                                                      |
| prot965  | NT01EC3995 | X | STM3426 |   | <i>rpsH</i> | Ribosomal protein S8                                                                                      |
| prot966  | NT01EC3997 | X | STM3428 | X | <i>rplE</i> | Ribosomal protein L5                                                                                      |
| prot967  | NT01EC3998 | X | STM3429 |   | <i>rplX</i> | Ribosomal protein L24                                                                                     |
| prot968  | NT01EC4000 | X | STM3430 |   | <i>rplN</i> | Ribosomal protein L14                                                                                     |
| prot971  | NT01EC4004 | X | STM3433 | X | <i>rplP</i> | Ribosomal protein L16                                                                                     |
| prot972  | NT01EC4005 | X | STM3434 |   | <i>rpsC</i> | Ribosomal protein S3                                                                                      |
| prot973  | NT01EC4006 | X | STM3435 |   | <i>rplV</i> | Ribosomal protein L22                                                                                     |
| prot975  | NT01EC4010 | X | STM3437 | X | <i>rplB</i> | Ribosomal protein L2                                                                                      |
| prot976  | NT01EC4011 | X | STM3438 |   | <i>rplW</i> | Ribosomal protein L23                                                                                     |
| prot977  | NT01EC4013 | X | STM3439 | X | <i>rplD</i> | Ribosomal protein L4                                                                                      |
| prot978  | NT01EC4015 | X | STM3440 | X | <i>rplC</i> | Ribosomal protein L3                                                                                      |
| prot982  | NT01EC4040 | X | STM3447 | X | <i>rpsG</i> | Ribosomal protein S7                                                                                      |
| prot983  | NT01EC4042 | X | STM3448 | X | <i>rpsG</i> | Ribosomal protein S12                                                                                     |
| prot987  | NT01EC4847 | X | STM4152 | X | <i>rplL</i> | Ribosomal protein L7/L12                                                                                  |
| prot988  | NT01EC4846 | X | STM4151 |   | <i>rplJ</i> | Ribosomal protein L10                                                                                     |
| prot990  | NT01EC4844 |   | STM4150 |   | <i>rplA</i> | Ribosomal protein L1                                                                                      |
| prot991  | NT01EC4842 |   | STM4149 |   | <i>rplK</i> | Ribosomal protein L11                                                                                     |
| prot1105 | NT01EC3822 | X | STM3282 |   | <i>pnpA</i> | Polyribonucleotide nucleotidyltransferase                                                                 |
| prot1106 | NT01EC3823 | X | STM3283 |   | <i>rpsO</i> | Ribosomal protein S15                                                                                     |
| prot1113 | NT01EC3826 | X | STM3286 | X | <i>infB</i> | Translation initiation factor IF-2 (InfB)                                                                 |
| prot1121 | NT01EC3040 | X | STM2523 |   | <i>ispG</i> | 4-hydroxy-3-methylbut-2-en-1-yl diphosphate synthase                                                      |
| prot1132 | NT01EC0202 | X | STM0219 |   | <i>frr</i>  | Ribosome recycling factor                                                                                 |
| prot1135 | NT01EC0197 | X | STM0216 |   | <i>rpsB</i> | Ribosomal protein S2                                                                                      |
| prot1153 | NT01EC2920 | X | STM2427 | X | <i>ligA</i> | DNA ligase, NAD-dependent                                                                                 |
| prot1170 | NT01EC1458 | X | STM1783 |   | <i>pth</i>  | Peptidyl-tRNA hydrolase                                                                                   |
| prot1172 | NT01EC1462 | X | STM1780 |   |             | Ribose-phosphate pyrophosphokinase                                                                        |
| prot1200 | NT01EC3353 |   | STM2952 | X | <i>eno</i>  | Enolase                                                                                                   |
| prot1215 | NT01EC0648 |   | STM0542 | X | <i>folD</i> | Bifunctional 5,10-methylene-tetrahydrofolate dehydrogenase/5,10-methylene-tetrahydrofolate cyclohydrolase |

|          |            |   |         |   |             |                                                                                                  |
|----------|------------|---|---------|---|-------------|--------------------------------------------------------------------------------------------------|
| prot1225 | NT01EC4871 |   | STM4176 |   | <i>purH</i> | Bifunctional IMP<br>cyclohydrolase/phosphoribosylaminoimidazolecarboxa<br>mide formyltransferase |
| prot1286 | NT01EC1088 | X | STM0963 | X | <i>serS</i> | Seryl-tRNA synthetase                                                                            |
| prot1315 | NT01EC4500 |   | STM3837 |   |             | DNA polymerase III, beta subunit                                                                 |
| prot1333 | NT01EC5137 | X | STM4394 |   | <i>rpLL</i> | Ribosomal protein L9                                                                             |
| prot1443 | NT01EC2802 |   | STM2362 |   | <i>purF</i> | Family C44 non-peptidase homologues                                                              |
| prot1462 | NT01EC3160 | X | STM2681 |   | <i>grpE</i> | Heat shock protein                                                                               |
| prot1463 | NT01EC0015 | X | STM0012 | X | <i>dnaK</i> | Chaperone protein                                                                                |
| prot1493 | NT01EC5109 |   | STM4366 |   | <i>purA</i> | Adenylosuccinate synthetase                                                                      |

---
